# Supplementary material
Source: publisher figshare collection journal article supplement (https://frontiersin.figshare.com/ndownloader/files/12389921)
Supplement: Supplementary file [file 12389921]

## ***Supplementary Material***

### **Novel mutations in the asparagine synthetase gene (*ASNS*) associated with microcephaly**

**Dorit Schleinitz, Anna Seidel, Ruth Stassart, Jürgen Klammt, Petra G. Hirrlinger, Ulrike Winkler, Susanne Köhler, John T. Heiker, Ria Schönauer, Joanna Bialek, Knut Krohn, Katrin Hoffmann, Peter Kovacs\*, Johannes Hirrlinger\***

**\* Correspondence:** peter.kovacs@medizin.uni-leipzig.de  
johannes.hirrlinger@medizin.uni-leipzig.de

**Supplementary Figure 1. Conservation of amino acids in ASNS.** Sequences were derived from the UniProt database (UniProtKB; Pundir et al., 2017; The UniProt consortium, 2017) and aligned using the Clustal Omega (1.2.4) multiple sequence alignment program implemented in UniProt. The following organisms were included: Human (*Homo sapiens*), Sumatran orangutan (*Pongo abelii*), Rhesus macaque (*Macaca mulatta*), Bovine (*Bos taurus*), Chicken (*Gallus gallus*), Mouse (*Mus musculus*), Rat (*Rattus norvegicus*), Chinese hamster (*Cricetulus griseus*), and Zebrafish (*Danio rerio*). Conservation: \*(asterix) single fully conserved residue; :(colon) conservation between groups of strongly similar properties – scoring >0.5 in the Gonnet PAM 250 matrix; .(period) conservation between groups of weakly similar properties – scoring ≤0.5 in the Gonnet PAM 250 matrix (according to Uniprot; <http://www.uniprot.org>). Mutations described for ASNSD are given in blue, the mutations found in the family of this case report in green.

#### **References**

Pundir, S., Martin, M. J., & O'Donovan, C. (2017). UniProt Protein Knowledgebase. *Methods Mol Biol*, 1558, 41-55.

The UniProt consortium. (2017). UniProt: the universal protein knowledgebase. *Nucleic Acids Res*, 45, D158-D169.

| UniProtKB ASNs                    | A6E       | R49Q                                                           |     |
|-----------------------------------|-----------|----------------------------------------------------------------|-----|
| P08243                            | HUMAN     | MCGIWAFLFGSDDDL SVQCL SAMKIAHRGPDADF RFENNVNGYTNCCFGFHR        | 160 |
| Q5R6W9                            | ORANGUTAN | MCGIWAFLFGSDDDL SVQCL SAMKIAHRGPDADF RFENNVNGYTNCCFGFHR        | 60  |
| F6SS13                            | MACAQUE   | MCGIWAFLFGSDDDL SVQCL SAMKIAHRGPDADF RFENNVNGYTNCCFGFHR        | 60  |
| Q1L2A3                            | BOVINE    | MCGIWAFLFGSDDDL SVQCL SAMKIAHRGPDADF RFENNVNGYTNCCFGFHR        | 60  |
| Q5ZJ3J                            | CHICKEN   | MCGIWAFLFGSDECL SVQCL SAMKIAHRGPDADF RFENNVNGYTNCCFGFHR        | 60  |
| Q61024                            | MOUSE     | MCGIWAFLFGSDDDL SVQCL SAMKIAHRGPDADF RFENNVNGYTNCCFGFHR        | 60  |
| P49088                            | RAT       | MCGIWAFLFGSDDDL SVQCL SAMKIAHRGPDADF RFENNVNGYTNCCFGFHR        | 60  |
| P19891                            | HAMSTER   | MCGIWAFLFGSDDDL SVQCL SAMKIAHRGPDADF RFENNVNGYTNCCFGFHR        | 60  |
| A3KQK2                            | ZEBRAFISH | MCGIWAFLFGSDECL SVQCL SAMKIAHRGPDADF RFENNVNGYTNCCFGFHR        | 60  |
| Conservation                      | 1         | *****                                                          | 60  |
| glutamine amidotransferase domain |           |                                                                |     |
| K66Nfs*10 N75S                    |           |                                                                |     |
| P08243                            | HUMAN     | PIRVKKYPYLWLCYNGEIIYNHKKMQHFEFEYQTKVDGEIILHL YDKGGIEQITCMLDGV  | 120 |
| Q5R6W9                            | ORANGUTAN | PIRVKKYPYLWLCYNGEIIYNHKKMQHFEFEYQTKVDGEIILHL YDKGGIEQITCMLDGV  | 120 |
| F6SS13                            | MACAQUE   | PIRVKKYPYLWLCYNGEIIYNHKKMQHFEFEYQTKVDGEIILHL YDKGGIEQITCMLDGV  | 120 |
| Q1L2A3                            | BOVINE    | PIRVKKYPYLWLCYNGEIIYNHKKMQHFEFEYQTKVDGEIILHL YDKGGIEQITCMLDGV  | 120 |
| Q5ZJ3J                            | CHICKEN   | PIRVKKYPYLWLCYNGEIIYNHKKMQHFEFEYQTKVDGEIILHL YDKGGIEQITCMLDGV  | 120 |
| Q61024                            | MOUSE     | PIRVKKYPYLWLCYNGEIIYNHKKMQHFEFEYQTKVDGEIILHL YDKGGIEQITCMLDGV  | 120 |
| P49088                            | RAT       | PIRVKKYPYLWLCYNGEIIYNHKKMQHFEFEYQTKVDGEIILHL YDKGGIEQITCMLDGV  | 120 |
| P19891                            | HAMSTER   | PIRVKKYPYLWLCYNGEIIYNHKKMQHFEFEYQTKVDGEIILHL YDKGGIEQITCMLDGV  | 120 |
| A3KQK2                            | ZEBRAFISH | PIRVKKYPYLWLCYNGEIIYNHKKMQHFEFEYQTKVDGEIILHL YDKGGIEQITCMLDGV  | 120 |
| Conservation                      | 61        | *****                                                          | 120 |
| D138A L145S                       |           |                                                                |     |
| P08243                            | HUMAN     | FAFVLLDTANKKVFVLRD TYGVRPLFKAMTEDGFLAVCSEAKGLVTLKHSTTFLPKVEPF  | 180 |
| Q5R6W9                            | ORANGUTAN | FAFVLLDTANKKVFVLRD TYGVRPLFKAMTEDGFLAVCSEAKGLVTLKHSTTFLPKVEPF  | 180 |
| F6SS13                            | MACAQUE   | FAFVLLDTANKKVFVLRD TYGVRPLFKAMTEDGFLAVCSEAKGLVTLKHSTTFLPKVEPF  | 180 |
| Q1L2A3                            | BOVINE    | FAFVLLDTANKKVFVLRD TYGVRPLFKAMTEDGFLAVCSEAKGLVTLKHSTTFLPKVEPF  | 180 |
| Q5ZJ3J                            | CHICKEN   | FAFVLLDTANKKVFVLRD TYGVRPLFKAMTEDGFLAVCSEAKGLVTLKHSTTFLPKVEPF  | 180 |
| Q61024                            | MOUSE     | FAFVLLDTANKKVFVLRD TYGVRPLFKAMTEDGFLAVCSEAKGLVTLKHSTTFLPKVEPF  | 180 |
| P49088                            | RAT       | FAFVLLDTANKKVFVLRD TYGVRPLFKAMTEDGFLAVCSEAKGLVTLKHSTTFLPKVEPF  | 180 |
| P19891                            | HAMSTER   | FAFVLLDTANKKVFVLRD TYGVRPLFKAMTEDGFLAVCSEAKGLVTLKHSTTFLPKVEPF  | 180 |
| A3KQK2                            | ZEBRAFISH | FAFVLLDTANKKVFVLRD TYGVRPLFKAMTEDGFLAVCSEAKGLVTLKHSTTFLPKVEPF  | 180 |
| Conservation                      | 121       | *****                                                          | 180 |
| M201Wfs*28                        |           |                                                                |     |
| P08243                            | HUMAN     | LPGHYEVLDPKNGKVASVEVKYVHHC RDVPLHALYDNVEKLPFGFEIETVKNNLRILFN   | 240 |
| Q5R6W9                            | ORANGUTAN | LPGHYEVLDPKNGKVASVEVKYVHHC RDVPLHALYDNVEKLPFGFEIETVKNNLRILFN   | 240 |
| F6SS13                            | MACAQUE   | LPGHYEVLDPKNGKVASVEVKYVHHC RDVPLHALYDNVEKLPFGFEIETVKNNLRILFN   | 240 |
| Q1L2A3                            | BOVINE    | LPGHYEVLDPKNGKVASVEVKYVHHC RDVPLHALYDNVEKLPFGFEIETVKNNLRILFN   | 240 |
| Q5ZJ3J                            | CHICKEN   | LPGHYEVLDPKNGKVASVEVKYVHHC RDVPLHALYDNVEKLPFGFEIETVKNNLRILFN   | 240 |
| Q61024                            | MOUSE     | LPGHYEVLDPKNGKVASVEVKYVHHC RDVPLHALYDNVEKLPFGFEIETVKNNLRILFN   | 240 |
| P49088                            | RAT       | LPGHYEVLDPKNGKVASVEVKYVHHC RDVPLHALYDNVEKLPFGFEIETVKNNLRILFN   | 240 |
| P19891                            | HAMSTER   | LPGHYEVLDPKNGKVASVEVKYVHHC RDVPLHALYDNVEKLPFGFEIETVKNNLRILFN   | 240 |
| A3KQK2                            | ZEBRAFISH | LPGHYEVLDPKNGKVASVEVKYVHHC RDVPLHALYDNVEKLPFGFEIETVKNNLRILFN   | 240 |
| Conservation                      | 181       | *****                                                          | 240 |
| end asparagine synthetase domain  |           |                                                                |     |
| V243A L247W G289A                 |           |                                                                |     |
| P08243                            | HUMAN     | NAWKKRLMTDRRIGCLL SGGDLSSVLAATLLKQLKEAQVYQLQTFATIGMEDSPDLLAAR  | 300 |
| Q5R6W9                            | ORANGUTAN | NAWKKRLMTDRRIGCLL SGGDLSSVLAATLLKQLKEAQVYQLQTFATIGMEDSPDLLAAR  | 300 |
| F6SS13                            | MACAQUE   | NAWKKRLMTDRRIGCLL SGGDLSSVLAATLLKQLKEAQVYQLQTFATIGMEDSPDLLAAR  | 300 |
| Q1L2A3                            | BOVINE    | NAWKKRLMTDRRIGCLL SGGDLSSVLAATLLKQLKEAQVYQLQTFATIGMEDSPDLLAAR  | 300 |
| Q5ZJ3J                            | CHICKEN   | NAWKKRLMAHRRIIGCLL SGGDLSSVLAATLLKQLKEAQVYQLQTFATIGMEDSPDLLAAR | 300 |
| Q61024                            | MOUSE     | NAWKKRLMTDRRIGCLL SGGDLSSVLAATLLKQLKEAQVYQLQTFATIGMEDSPDLLAAR  | 300 |
| P49088                            | RAT       | NAWKKRLMTDRRIGCLL SGGDLSSVLAATLLKQLKEAQVYQLQTFATIGMEDSPDLLAAR  | 300 |
| P19891                            | HAMSTER   | NAWKKRLMTDRRIGCLL SGGDLSSVLAATLLKQLKEAQVYQLQTFATIGMEDSPDLLAAR  | 300 |
| A3KQK2                            | ZEBRAFISH | NAWKKRLMAHRRIIGCLL SGGDLSSVLAATLLKQLKEAQVYQLQTFATIGMEDSPDLLAAR | 300 |
| Conservation                      | 241       | *****                                                          | 300 |
| T337I R340H                       |           |                                                                |     |
| P08243                            | HUMAN     | KVADHIGSEHYEVL FNSEEGIQALDEVIFSL ETDYITVRASVGMYLISKYIRKNTDSVV  | 360 |
| Q5R6W9                            | ORANGUTAN | KVADHIGSEHYEVL FNSEEGIQALDEVIFSL ETDYITVRASVGMYLISKYIRKNTDSVV  | 360 |
| F6SS13                            | MACAQUE   | KVADHIGSEHYEVL FNSEEGIQALDEVIFSL ETDYITVRASVGMYLISKYIRKNTDSVV  | 360 |
| Q1L2A3                            | BOVINE    | KVADHIGSEHYEVL FNSEEGIQALDEVIFSL ETDYITVRASVGMYLISKYIRKNTDSVV  | 360 |
| Q5ZJ3J                            | CHICKEN   | KVADHIGSEHYEVL FNSEEGIQALDEVIFSL ETDYITVRASVGMYLISKYIRKNTDSVV  | 360 |
